# Supplementary material
Source: HighWire-hosted journal article supplement (http://molpharm.aspetjournals.org/highwire/filestream/77378/field_highwire_adjunct_files/0/Supplemental_99184.pdf)
Supplement: Supplemental_99184.pdf [file Supplemental_99184.pdf]

## **Supplemental Data**

### **Intracellular Dynamics and Fate of a Humanized Anti-Interleukin-6 Receptor Monoclonal Antibody, Tocilizumab (TCZ)**

Keiko Fujimoto, Hiroaki Ida, Yuko Hirota, Masaki Ishigai, Jun Amano, and Yoshitaka Tanaka

Division of Pharmaceutical Cell Biology, Graduate School of Pharmaceutical Sciences (K.F., H.I., Y.H., Y.T.), Organelle Homeostasis Research Center, Kyushu University, 3-1-1 Maidashi, Fukuoka 812-8582 (K.F., Y.T.), and Chugai Pharmaceutical Co., Ltd., Fuji-Gotemba Research Laboratories, 1-135 Komakado, Gotemba-shi, Shizuoka 412-8513, Japan (M.I., J.A.)

Supplemental Figure: 5

Journal: Molecular Pharmacology

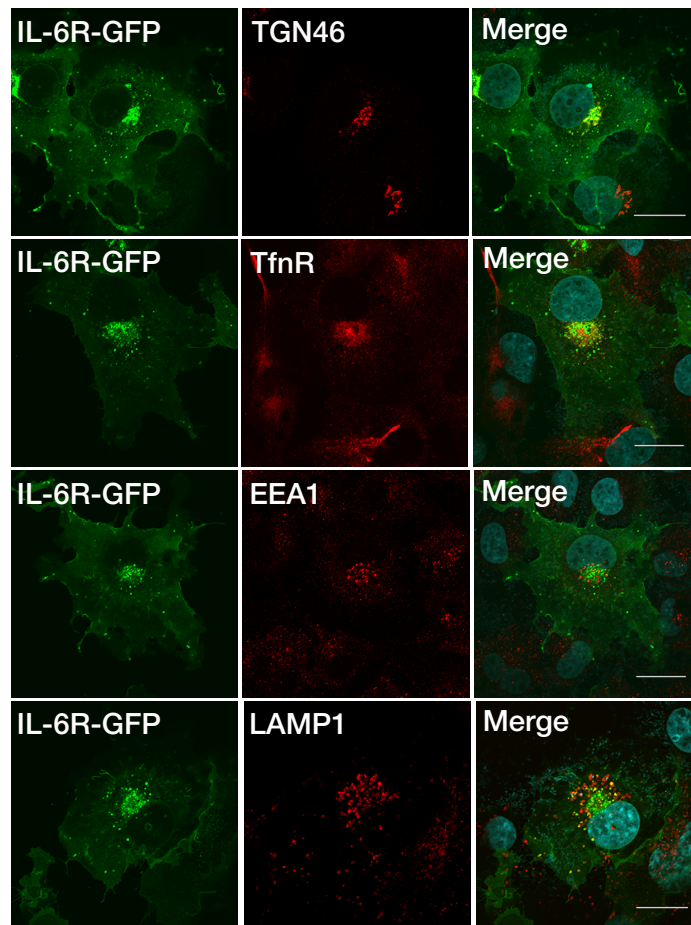

**Supplemental Figure 1. Intracellular localization of IL-6R-GFP in COS-1 cells.** COS-1 cells were transiently transfected with an expression plasmid encoding IL-6R-GFP, fixed and incubated with primary antibodies to TGN46, EEA1 or LAMP-1. The primary antibodies were revealed by incubation with Cy3-labeled secondary antibodies. Nuclei were labeled with DAPI. Cells were visualized by confocal microscopy. Right columns show the merged images for triple staining of IL-6R-GFP (green), each organelle marker (red) and DAPI (cyan). Bars, 20  $\mu\text{m}$ .

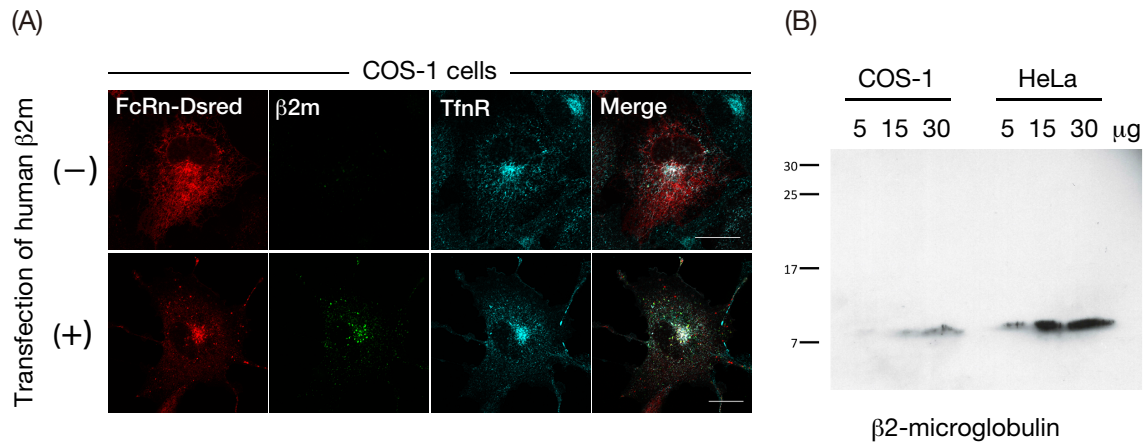

**Supplemental Figure 2. Effect of expression of  $\beta$ 2m on the localization of FcRn in COS-1 cells.** A, COS-1 cells were transiently transfected with either an expression plasmid encoding FcRn-DsRed alone (top columns) or FcRn-DsRed and  $\beta$ 2m (bottom columns), fixed and incubated with primary antibodies to  $\beta$ 2m or TfnR. The primary antibodies were revealed by incubation with Cy3-labeled secondary antibodies. Cells were visualized by confocal microscopy. Right columns show the merged images for triple staining of FcRn-DsRed (red),  $\beta$ 2m (green) and TfnR (cyan). Bars, 20  $\mu$ m.

B, Western blotting of  $\beta$ 2m from COS-1 and HeLa cells. The indicated amounts of COS-1 or HeLa cell lysates were subjected to SDS-PAGE, followed by Western blot analysis for  $\beta$ 2m or  $\beta$ -actin.

Cell surface bound

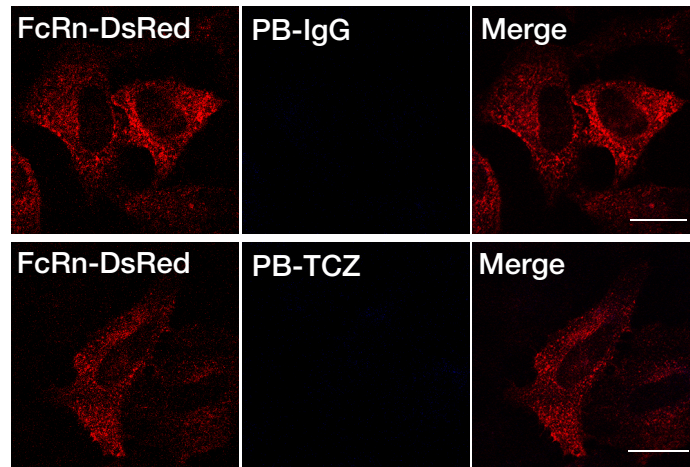

**Supplemental Figure 3. FcRn-DsRed is not involved in both binding with and internalization of PB-TCZ.** HeLa cells transiently transfected with an expression plasmid encoding FcRn-DsRed were incubated with 2  $\mu\text{g/ml}$  PB-IgG or PB-TCZ at 4  $^{\circ}\text{C}$  for 30 min. Cells were then fixed and fluorescence signals were visualized by confocal microscopy. Right columns show the merged images for double staining of FcRn-DsRed (red) and PB-IgG or PB-TCZ (cyan). Bars, 20  $\mu\text{m}$ .

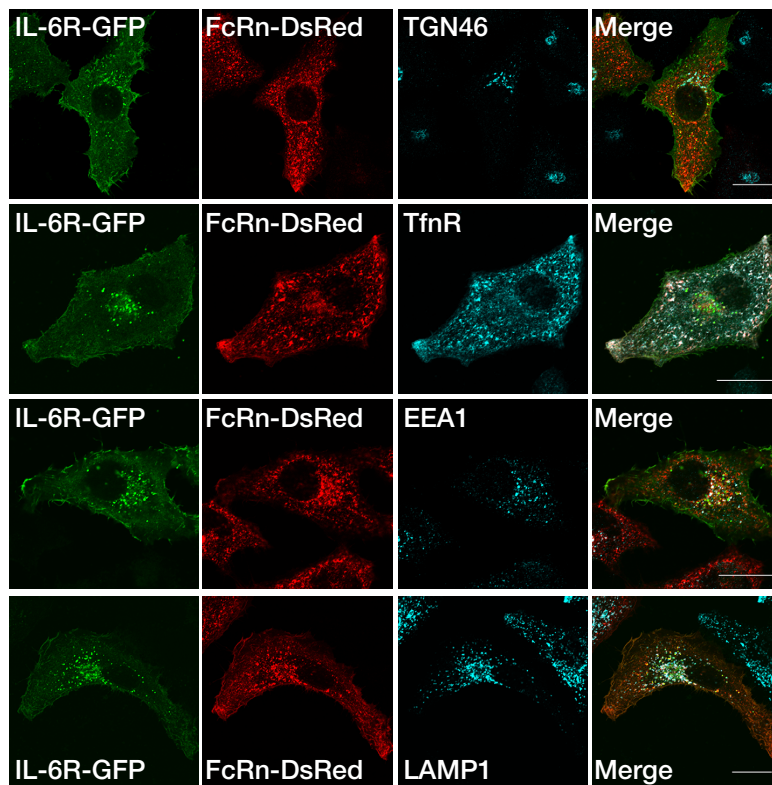

**Supplemental Figure 4. Effect of IL-6R-GFP expression on the intracellular distribution of FcRn-DsRed.** HeLa cells were transiently co-transfected with an expression plasmid encoding IL-6R-GFP and FcRn-DsRed. After 24 h, cells were fixed, permeabilized, and incubated with primary antibodies to TGN46, TfnR, EEA1, or LAMP-1. The primary antibodies were revealed by incubation with Cy5-labeled secondary antibodies. Cells were visualized by confocal microscopy. Right columns show the merged images for triple staining of IL-6R-GFP (green), FcRn-DsRed (red) and each organelle marker (cyan). Bars, 20  $\mu$ m.

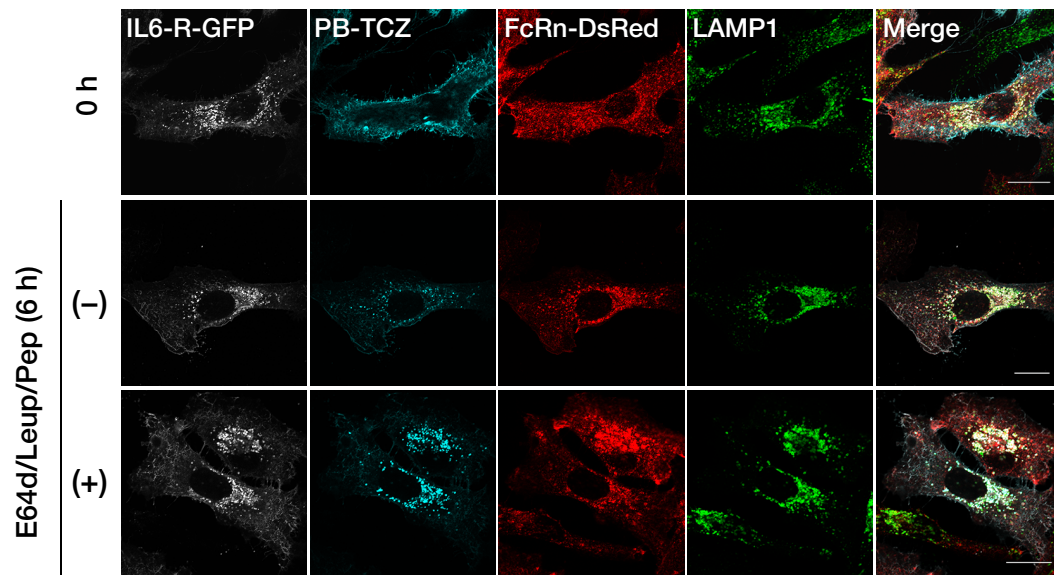

**Supplemental Figure 5. Transport of FcRn-DsRed to late endosomes/lysosomes.** HeLa cells co-transfected with an expression plasmid encoding IL-6R-GFP and FcRn-DsRed were incubated with PB-TCZ (2  $\mu\text{g/ml}$ ) at 4  $^{\circ}\text{C}$  for 30 min and allowed to internalize the antibody in the absence or presence of E64d/Leup/Pep for 6 h at 37  $^{\circ}\text{C}$ . Cells were then fixed, permeabilized, and incubated with primary antibodies to LAMP-1 and Cy5-labeled secondary antibodies. Cells were visualized by confocal microscopy. Right columns show the merged images for triple staining of PB-TCZ (cyan), FcRn-DsRed (red), and LAMP-1 (green). Left columns show the images for single staining of IL-6R-GFP in white. Bars, 20  $\mu\text{m}$ .
